# Supplementary material for: Gene duplications and phylogenomic conflict underlie major pulses of phenotypic evolution in gymnosperms
Source: Springer Nature journal article supplement (doi:10.1038/s41477-021-00964-4), 2021-07-19
Supplement: 41477_2021_964_MOESM2_ESM.pdf [file 41477_2021_964_MOESM2_ESM.pdf]

## Reporting Summary

Nature Research wishes to improve the reproducibility of the work that we publish. This form provides structure for consistency and transparency in reporting. For further information on Nature Research policies, see our [Editorial Policies](#) and the [Editorial Policy Checklist](#).

### Statistics

For all statistical analyses, confirm that the following items are present in the figure legend, table legend, main text, or Methods section.

n/a Confirmed

- The exact sample size ( $n$ ) for each experimental group/condition, given as a discrete number and unit of measurement
- A statement on whether measurements were taken from distinct samples or whether the same sample was measured repeatedly
- The statistical test(s) used AND whether they are one- or two-sided  
*Only common tests should be described solely by name; describe more complex techniques in the Methods section.*
- A description of all covariates tested
- A description of any assumptions or corrections, such as tests of normality and adjustment for multiple comparisons
- A full description of the statistical parameters including central tendency (e.g. means) or other basic estimates (e.g. regression coefficient) AND variation (e.g. standard deviation) or associated estimates of uncertainty (e.g. confidence intervals)
- For null hypothesis testing, the test statistic (e.g.  $F$ ,  $t$ ,  $r$ ) with confidence intervals, effect sizes, degrees of freedom and  $P$  value noted  
*Give  $P$  values as exact values whenever suitable.*
- For Bayesian analysis, information on the choice of priors and Markov chain Monte Carlo settings
- For hierarchical and complex designs, identification of the appropriate level for tests and full reporting of outcomes
- Estimates of effect sizes (e.g. Cohen's  $d$ , Pearson's  $r$ ), indicating how they were calculated

*Our web collection on [statistics for biologists](#) contains articles on many of the points above.*

### Software and code

Policy information about [availability of computer code](#)

Data collection

None

Data analysis

Trinity v2.4.0  
 SOAPdenovo v1  
 TransDecoder v5.3.0  
 CD-HIT  
 Organelle Genome Assembler pipeline  
 SPAdes v3.13.0  
 Bowtie v2.3.2  
 Geneious v8.0.2  
 BLAST  
 Code from Yang and Smith 2014  
 MAFFT v7  
 FastTree v2  
 RAxML v8.2.12  
 ASTRAL-III  
 Newick Utilities  
 Phyx  
 IQ-TREE  
 PhyParts  
 Phypartspiecharts.py, minority\_report.py (<https://github.com/mossmatters/phyloscripts>)  
 Code from Yang et al. 2018  
 Code from <https://bitbucket.org/blackrim/clustering/src/master>

Code from [https://github.com/jfwalker/JFW\\_NonCore\\_Caryophyllales](https://github.com/jfwalker/JFW_NonCore_Caryophyllales)  
 Code from <https://github.com/nstenz/plot-ks>  
 Code from [https://github.com/tanghaibao/bio-pipeline/tree/master/synonymous\\_calculation](https://github.com/tanghaibao/bio-pipeline/tree/master/synonymous_calculation)  
 PyPhlawd  
 RAxML-ng  
 PartitionFinder v2  
 treePL  
 ChromEvol v2  
 FigTree  
 R v3.6.3  
 Phytools v0.7-70  
 BAMB  
 BAMBtools  
 CoordinateCleaner  
 Code from Parins-Fukuchi et al. 2021

For manuscripts utilizing custom algorithms or software that are central to the research but not yet described in published literature, software must be made available to editors and reviewers. We strongly encourage code deposition in a community repository (e.g. GitHub). See the Nature Research [guidelines for submitting code & software](#) for further information.

## Data

Policy information about [availability of data](#)

All manuscripts must include a [data availability statement](#). This statement should provide the following information, where applicable:

- Accession codes, unique identifiers, or web links for publicly available datasets
- A list of figures that have associated raw data
- A description of any restrictions on data availability

### Data availability

The newly generated raw sequence data is available at the NCBI Sequence Read Archive (<https://www.ncbi.nlm.nih.gov/sra>) under BioProject PRJNA726756 (transcriptomic samples) and PRJNA726638 (genome skimming samples). The newly assembled plastid genomes are also available at NCBI (<https://www.ncbi.nlm.nih.gov>); see Supplementary Table 2 for sample accession numbers. Sequence alignments, phylogenies, Ks plots, phenotypic trait data, and other data analyzed (chromosome counts, c-values) are available on figshare (10.6084/m9.figshare.14547354).

## Field-specific reporting

Please select the one below that is the best fit for your research. If you are not sure, read the appropriate sections before making your selection.

- Life sciences       Behavioural & social sciences       Ecological, evolutionary & environmental sciences

For a reference copy of the document with all sections, see [nature.com/documents/nr-reporting-summary-flat.pdf](https://www.nature.com/documents/nr-reporting-summary-flat.pdf)

## Ecological, evolutionary & environmental sciences study design

All studies must disclose on these points even when the disclosure is negative.

|                          |                                                                                                                                                                                                                                                                                                                                                                                                                                                             |
|--------------------------|-------------------------------------------------------------------------------------------------------------------------------------------------------------------------------------------------------------------------------------------------------------------------------------------------------------------------------------------------------------------------------------------------------------------------------------------------------------|
| Study description        | Genomic, climatic, and phenotypic trait data were analyzed to examine phylogenetic relationships, polyploidy and other genomic events, and broader patterns of diversification, climatic occupancy evolution, and phenotypic innovation.                                                                                                                                                                                                                    |
| Research sample          | RNA and genomic DNA was isolated and sequenced from 77 gymnosperm samples (representing nearly all gymnosperm genera), which was combined with other available transcriptomic and plastid genomic data. We also sampled trait data for the 121 gymnosperm species (plus outgroups) represented by transcriptomic data in order to examine the correspondence between evolutionary patterns in genome and phenotype.                                         |
| Sampling strategy        | We aimed to sample RNA/transcriptomic data from all available gymnosperm genera; nearly all were sampled. Phenotypic data was sampled from the species in the transcriptomic dataset to allow comparisons of genomic and phenotypic evolution. Plastid gene and genomic data, occurrence data, and genome size and chromosomal data, were sampled from all available gymnosperm species in order to conduct diversification and other comparative analyses. |
| Data collection          | RNA samples were obtained from living collections, with voucher information presented in Supplementary Table 1. Trait data was scored using the literature (citations provided in Supplementary Information). Other data was obtained from publicly accessible databases (cited in the text).                                                                                                                                                               |
| Timing and spatial scale | Our sampling covers the temporal and geographic breadth of gymnosperm phylogeny.                                                                                                                                                                                                                                                                                                                                                                            |
| Data exclusions          | Several species (representing Gnetales) were excluded from a few analyses to explore the impact of their exclusion on the results.                                                                                                                                                                                                                                                                                                                          |
| Reproducibility          | Bootstrap analyses were conducted to estimate support for all branches in the gene trees, and local posterior probability values were estimated for branches in the species tree analyses. All newly generated data and major results were deposited in a publicly available repository, and we provide detailed descriptions of our methods and sources of publicly available data.                                                                        |

Randomization

Bootstrap analyses involved random resampling of sites in the sequence alignments in order to estimate bootstrap support for branches in inferred phylogenies.

Blinding

No blinding was performed in this study as it was not relevant to our study design.

Did the study involve field work?  Yes  No

## Reporting for specific materials, systems and methods

We require information from authors about some types of materials, experimental systems and methods used in many studies. Here, indicate whether each material, system or method listed is relevant to your study. If you are not sure if a list item applies to your research, read the appropriate section before selecting a response.

### Materials & experimental systems

- | n/a                                 | Involvement              | Item                          |
|-------------------------------------|--------------------------|-------------------------------|
| <input checked="" type="checkbox"/> | <input type="checkbox"/> | Antibodies                    |
| <input checked="" type="checkbox"/> | <input type="checkbox"/> | Eukaryotic cell lines         |
| <input checked="" type="checkbox"/> | <input type="checkbox"/> | Palaeontology and archaeology |
| <input checked="" type="checkbox"/> | <input type="checkbox"/> | Animals and other organisms   |
| <input checked="" type="checkbox"/> | <input type="checkbox"/> | Human research participants   |
| <input checked="" type="checkbox"/> | <input type="checkbox"/> | Clinical data                 |
| <input checked="" type="checkbox"/> | <input type="checkbox"/> | Dual use research of concern  |

### Methods

- | n/a                                 | Involvement              | Item                   |
|-------------------------------------|--------------------------|------------------------|
| <input checked="" type="checkbox"/> | <input type="checkbox"/> | ChIP-seq               |
| <input checked="" type="checkbox"/> | <input type="checkbox"/> | Flow cytometry         |
| <input checked="" type="checkbox"/> | <input type="checkbox"/> | MRI-based neuroimaging |
